# Supplementary figures and images for: p120 catenin is required for normal renal tubulogenesis and glomerulogenesis
Source: Oxford University Press journal article supplement (doi:10.1242/dev.056564), 2011-04-26

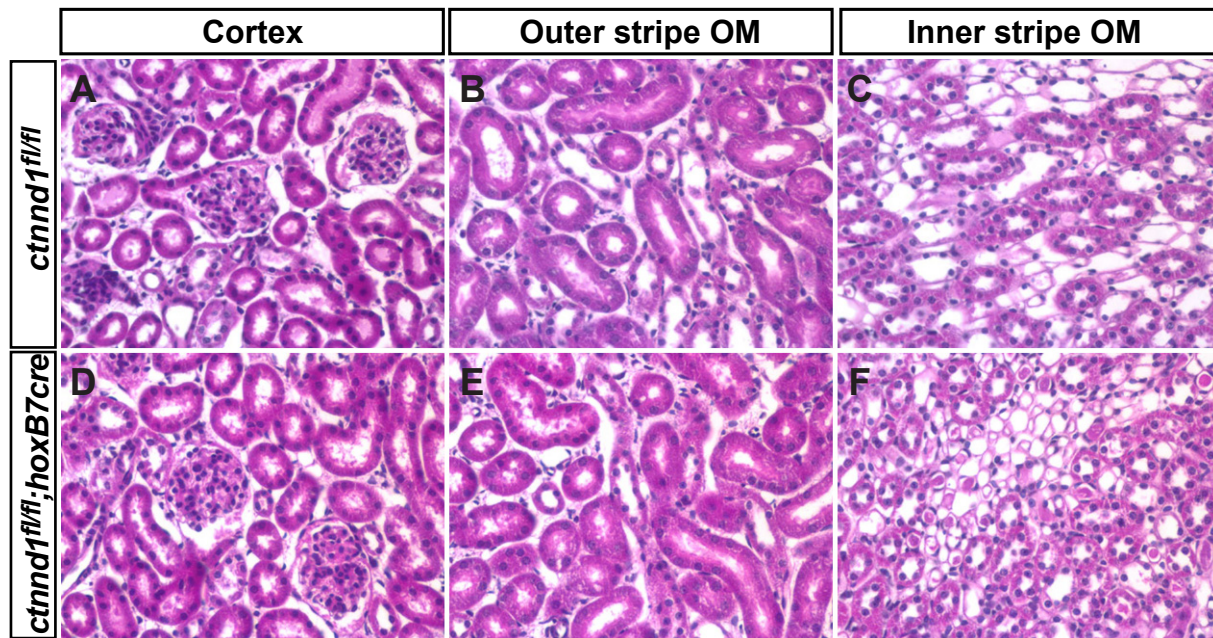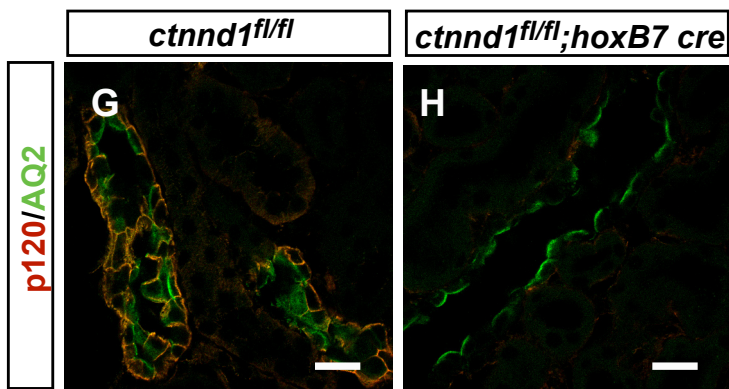

Supplement: dev056564figs1.pdf [file dev056564figs1.pdf]

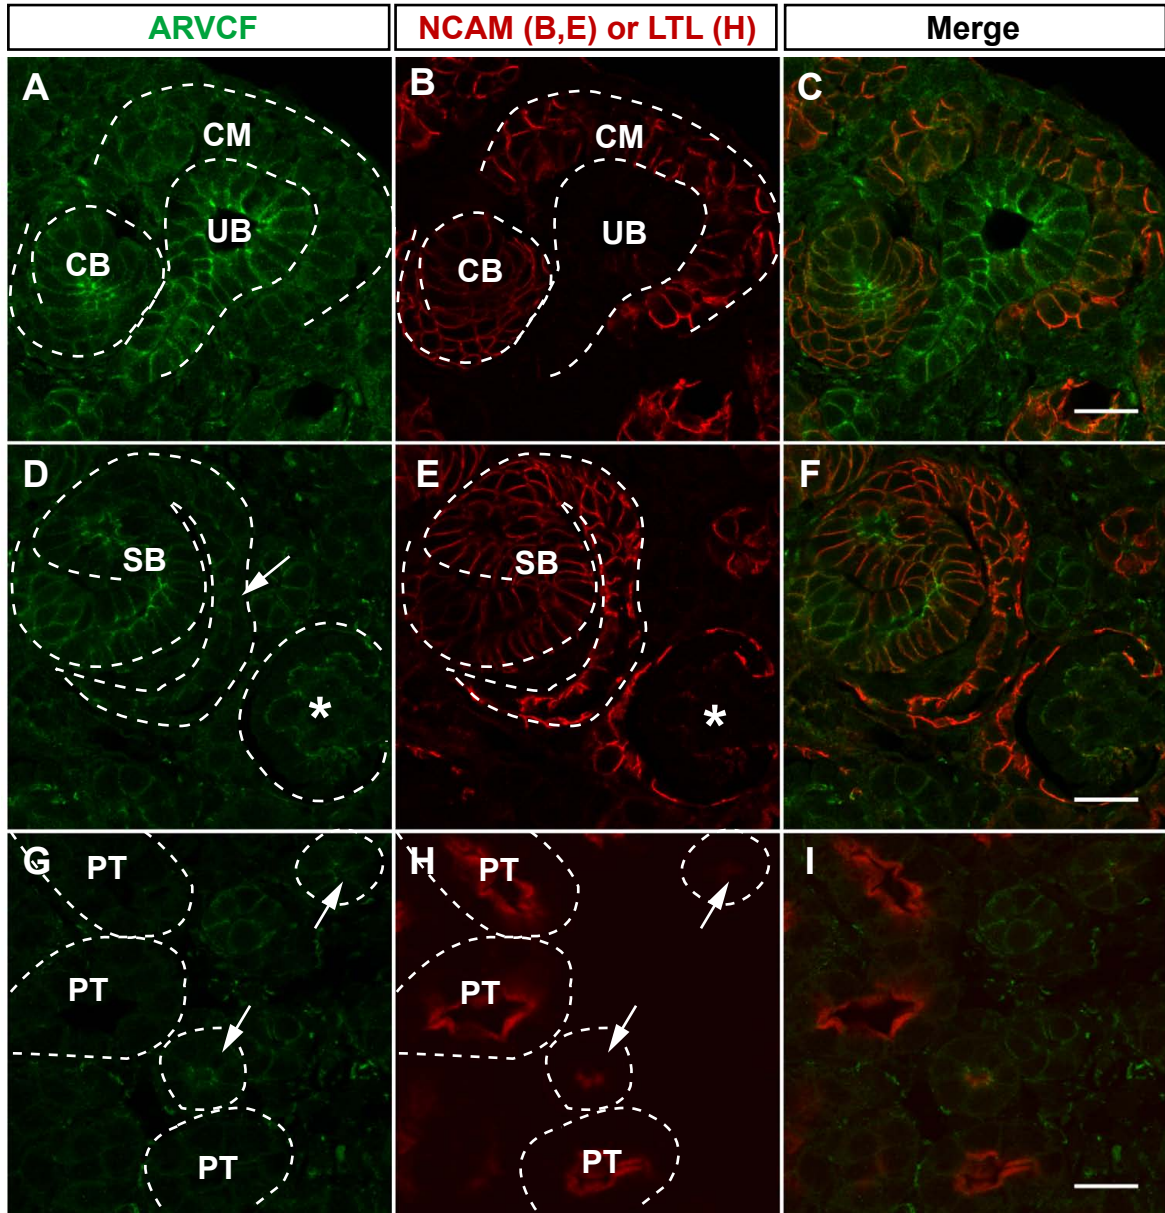

Supplement: dev056564figs2.pdf [file dev056564figs2.pdf]

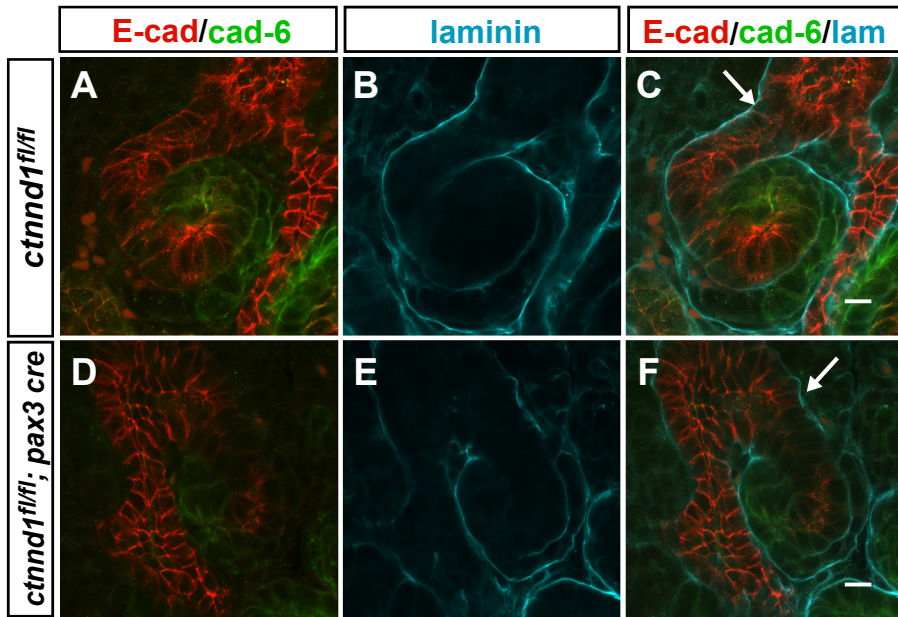

**G**

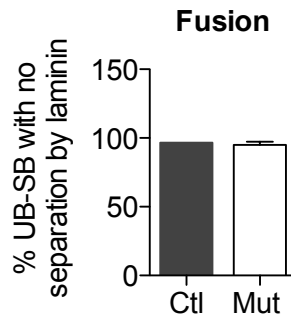

Supplement: dev056564figs3.pdf [file dev056564figs3.pdf]

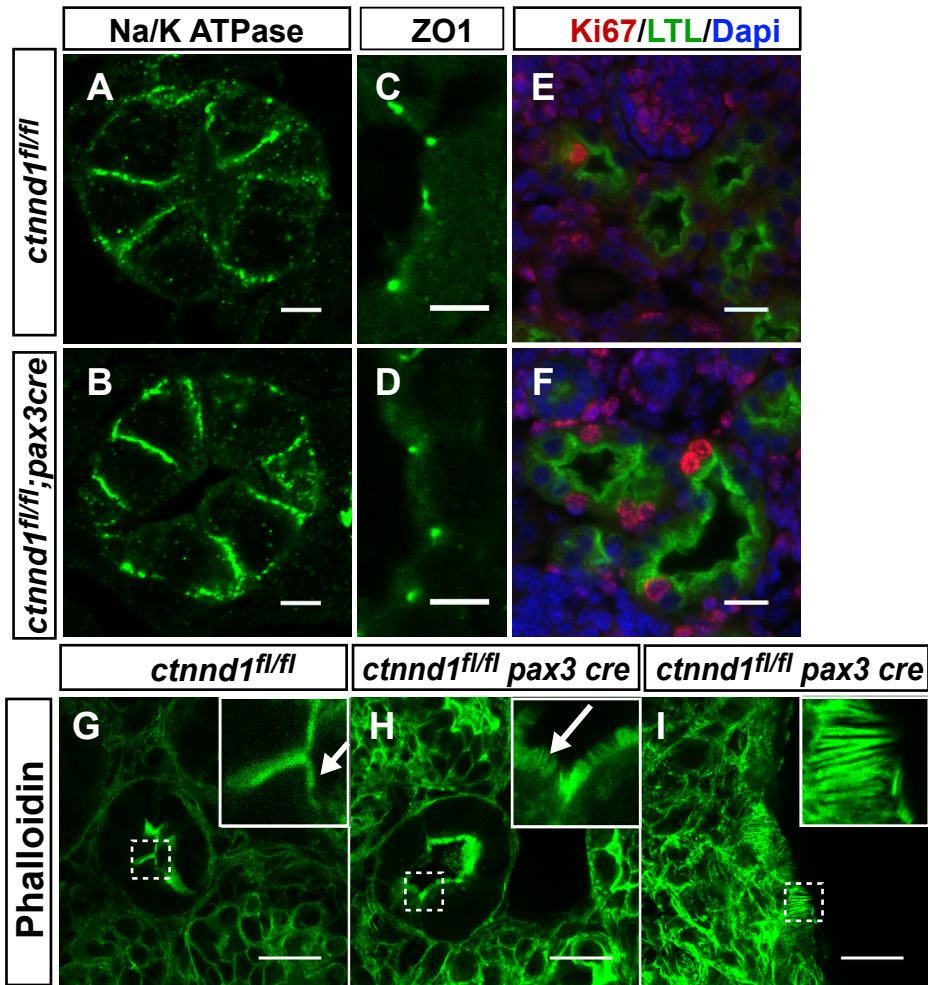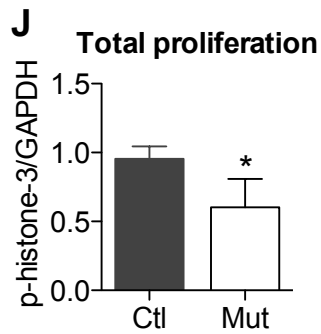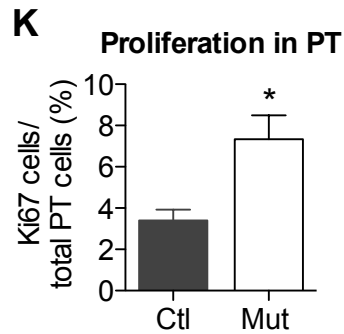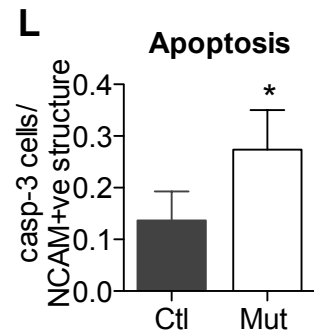

Supplement: dev056564figs4.pdf [file dev056564figs4.pdf]

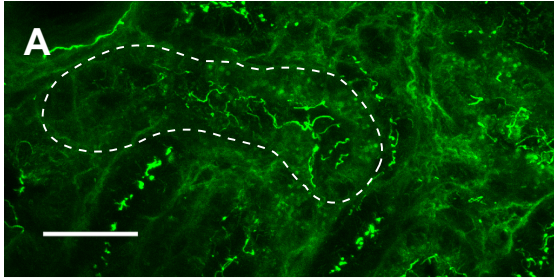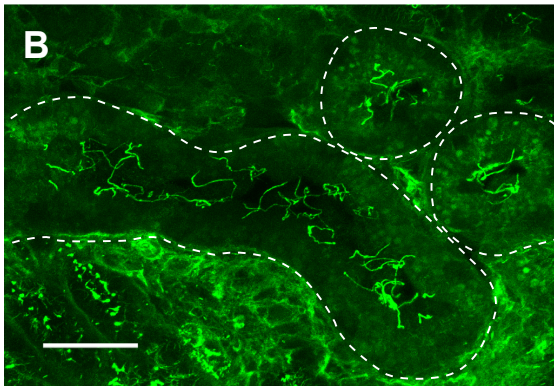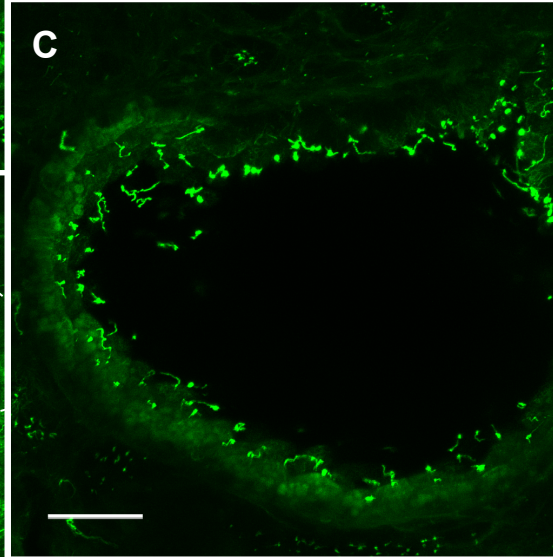

Supplement: dev056564figs5.pdf [file dev056564figs5.pdf]

**A**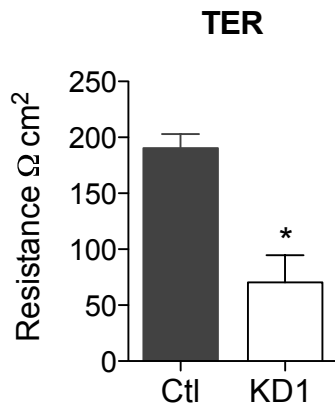**B**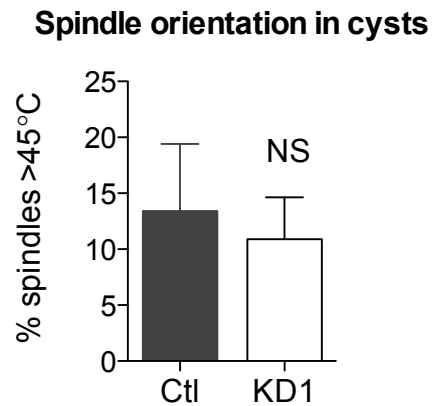

Supplement: dev056564figs6.pdf [file dev056564figs6.pdf]
